# Supplementary material for: Rest-activity circadian rhythm and impaired glucose tolerance in adults: an analysis of NHANES 2011–2014
Source: PubMed Central journal article supplement — BMJ Open Diabetes Res Care. 2022 Mar 3;10(2):e002632. doi: 10.1136/bmjdrc-2021-002632 (PMC8895931; doi:10.1136/bmjdrc-2021-002632), 2022-03-03
Supplement: bmjdrc-2021-002632supp001.pdf [file bmjdrc-2021-002632supp001.pdf]

Table S1. Associations of outcome variables and covariates in 3 models.

|                                                           | Outcome:2 hour glucose |                   | Outcome: fasting glucose |                   | Outcome: fasting insulin |                   | Outcome: HOMA-IR |                   |
|-----------------------------------------------------------|------------------------|-------------------|--------------------------|-------------------|--------------------------|-------------------|------------------|-------------------|
|                                                           | B                      | P*                | B                        | P                 | B                        | P*                | B                | P*                |
| Model 1                                                   |                        |                   |                          |                   |                          |                   |                  |                   |
| Age                                                       | <b>0.57</b>            | <b>&lt;0.0001</b> | <b>0.15</b>              | <b>&lt;0.0001</b> | -0.03                    | 0.344             | 0.00             | 0.574             |
| Sex: Female vs male                                       | <b>2.80</b>            | <b>0.018</b>      | <b>-3.33</b>             | <b>&lt;0.0001</b> | -0.26                    | 0.762             | -0.15            | 0.269             |
| Ethnicity                                                 |                        |                   |                          |                   |                          |                   |                  |                   |
| Non-Hispanic White                                        | Reference              |                   | Reference                |                   | Reference                |                   | Reference        |                   |
| Non-Hispanic Black                                        | 3.61                   | 0.083             | -0.73                    | 0.150             | <b>1.49</b>              | <b>0.011</b>      | <b>0.33</b>      | <b>0.026</b>      |
| Mex American                                              | 4.86                   | 0.057             | <b>1.98</b>              | <b>0.010</b>      | <b>2.02</b>              | <b>0.001</b>      | <b>0.52</b>      | <b>0.001</b>      |
| Other Hispanic                                            | 3.27                   | 0.115             | 0.36                     | 0.686             | -0.06                    | 0.567             | -0.03            | 0.573             |
| Non-Hispanic Asian                                        | <b>8.70</b>            | <b>&lt;0.0001</b> | 0.14                     | 0.821             | <b>-2.07</b>             | <b>&lt;0.0001</b> | <b>-0.50</b>     | <b>0.001</b>      |
| Other Race                                                | 0.01                   | 0.940             | 1.35                     | 0.313             | 0.06                     | 0.702             | 0.05             | 0.798             |
| Model 2                                                   |                        |                   |                          |                   |                          |                   |                  |                   |
| Physical Activity                                         |                        |                   |                          |                   |                          |                   |                  |                   |
| Poor                                                      | Reference              |                   | Reference                |                   | Reference                |                   | Reference        |                   |
| Intermediate                                              | 0.78                   | 0.831             | -0.57                    | 0.184             | -1.16                    | 0.265             | -0.35            | 0.232             |
| Ideal                                                     | <b>-6.44</b>           | <b>0.001</b>      | <b>-2.20</b>             | <b>&lt;0.0001</b> | <b>-3.72</b>             | <b>&lt;0.0001</b> | <b>-0.99</b>     | <b>&lt;0.0001</b> |
| Ratio of family income to poverty                         | -0.85                  | 0.214             | 0.10                     | 0.628             | -0.36                    | 0.073             | -0.08            | 0.127             |
| Current smoking: Yes vs No                                | <b>-9.37</b>           | <b>&lt;0.0001</b> | <b>0.60</b>              | <b>0.373</b>      | <b>-1.90</b>             | <b>0.001</b>      | <b>-0.46</b>     | <b>0.003</b>      |
| Model 3                                                   |                        |                   |                          |                   |                          |                   |                  |                   |
| BMI                                                       |                        |                   |                          |                   |                          |                   |                  |                   |
| Reference ( $\leq 25 \text{ kg / m}^2$ )                  | Reference              |                   | Reference                |                   | Reference                |                   | Reference        |                   |
| Overweight ( $25 < \text{BMI} \leq 30 \text{ kg / m}^2$ ) | 2.43                   | 0.159             | <b>2.02</b>              | <b>&lt;0.0001</b> | <b>3.03</b>              | <b>&lt;0.0001</b> | <b>0.75</b>      | <b>&lt;0.0001</b> |
| Obese ( $> 30 \text{ kg / m}^2$ )                         | <b>12.04</b>           | <b>&lt;0.0001</b> | <b>5.37</b>              | <b>&lt;0.0001</b> | <b>9.76</b>              | <b>&lt;0.0001</b> | <b>2.55</b>      | <b>&lt;0.0001</b> |
| History of Hypertension: Yes vs NO                        | <b>4.98</b>            | <b>0.034</b>      | 1.39                     | 0.077             | <b>1.99</b>              | <b>0.001</b>      | <b>0.58</b>      | <b>0.001</b>      |

Note: Model 2 has adjusted covariates in Model 1, and Model 3 has adjusted covariates in Model 1 and Model 2

\*P values were calculated using log-transformed outcome variables

Table S2. Associations of rest-activity parameters with outcomes in model 4

| Dependent variables | Rest-activity rhythm parameters | Model 4                         |                  |
|---------------------|---------------------------------|---------------------------------|------------------|
|                     |                                 | Regression coefficient (95% CI) | P                |
| 2h-glucose*         | RA                              | <b>-3.0 (-4.25 to -1.75)</b>    | <b>&lt;0.001</b> |
|                     | IV                              | <b>3.13 (1.62 to 4.64)</b>      | <b>0.001</b>     |
|                     | IS                              | -1.04 (-2.55 to 0.48)           | 0.20             |
|                     | M10 start time                  | 0.11 (-0.52 to 0.74)            | 0.63             |
|                     | L5 start time                   | 0.2 (-0.70 to 1.11)             | 0.78             |
| Fasting glucose     | RA                              | -0.25 (-0.59 to 0.09)           | 0.15             |
|                     | IV                              | -0.2 (-0.69 to 0.29)            | 0.41             |
|                     | IS                              | 0.09 (-0.37 to 0.56)            | 0.68             |
|                     | M10 start time                  | 0.004 (-0.12 to 0.13)           | 0.95             |
|                     | L5 start time                   | 0.12 (-0.12 to 0.35)            | 0.32             |
| Fasting insulin *   | RA                              | <b>-0.81 (-1.06 to -0.36)</b>   | <b>0.045</b>     |
|                     | IV                              | 0.64 (0.21 to 1.08)             | 0.10             |
|                     | IS                              | -0.34 (-0.77 to 0.09)           | 0.52             |
|                     | M10 start time                  | 0.18 (-0.39 to 0.41)            | 0.11             |
|                     | L5 start time                   | 0.16 (-0.57 to 0.37)            | 0.5              |
| HOMA-IR*            | RA                              | <b>-0.21 (-0.32 to -0.10)</b>   | <b>0.045</b>     |
|                     | IV                              | 0.16 (0.04 to 0.28)             | 0.19             |
|                     | IS                              | -0.09 (-0.20 to 0.02)           | 0.64             |
|                     | M10 start time                  | 0.05 (-0.01 to 0.11)            | 0.13             |
|                     | L5 start time                   | 0.05 (-0.005 to 0.11)           | 0.40             |

Model 4: Adjusted for age, sex, ethnicity, ratio of family income to poverty level, physical activity, smoking and history of hypertension

\* P values were calculated using log-transformed outcome variables
